# Supplementary material for: Modification of an oxyhalide solid-solution photocatalyst with an efficient O2-evolving cocatalyst and electron mediator for two-step photoexcitation overall water splitting
Source: Royal Society of Chemistry journal article supplement (doi:10.1039/d3nr05498e), 2023-12-22
Supplement: d3nr05498e1.pdf [file d3nr05498e1.pdf]

## **Modification of oxyhalide solid-solution photocatalyst with efficient O<sub>2</sub>-evolving cocatalyst and electron mediator for two-step photoexcitation overall water splitting**

Wenzheng Sun,<sup>a,b</sup> Ying Luo,<sup>a,b</sup> Jun Xu,<sup>a,b</sup> Qiaoqi Guo,<sup>a,b</sup> Lidan Deng,<sup>c</sup> Zheng Wang,<sup>a,b,\*</sup> and Hong He<sup>a,b,\*</sup>

<sup>a</sup> State Key Joint Laboratory of Environment Simulation and Pollution Control, Research Center for Eco-Environmental Sciences, Chinese Academy of Sciences, Beijing 100085, China

<sup>b</sup> University of Chinese Academy of Sciences, Beijing 100049, China

<sup>c</sup> School of Energy and Power Engineering, Huazhong University of Science and Technology, Wuhan 430074, China

\*Correspondence: zhengwang@rcees.ac.cn; honghe@rcees.ac.cn.

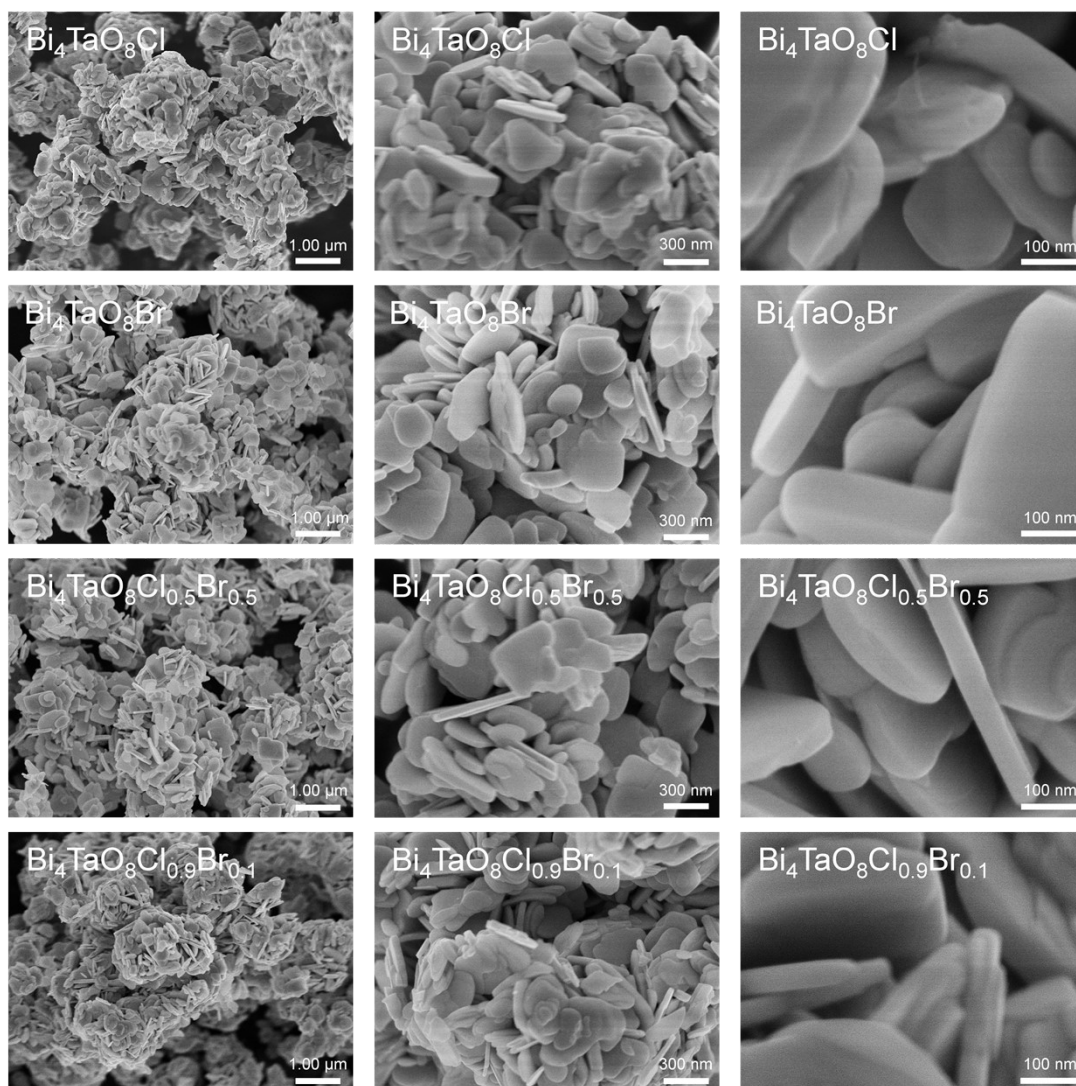

**Fig. S1** SEM images of four oxyhalide samples.

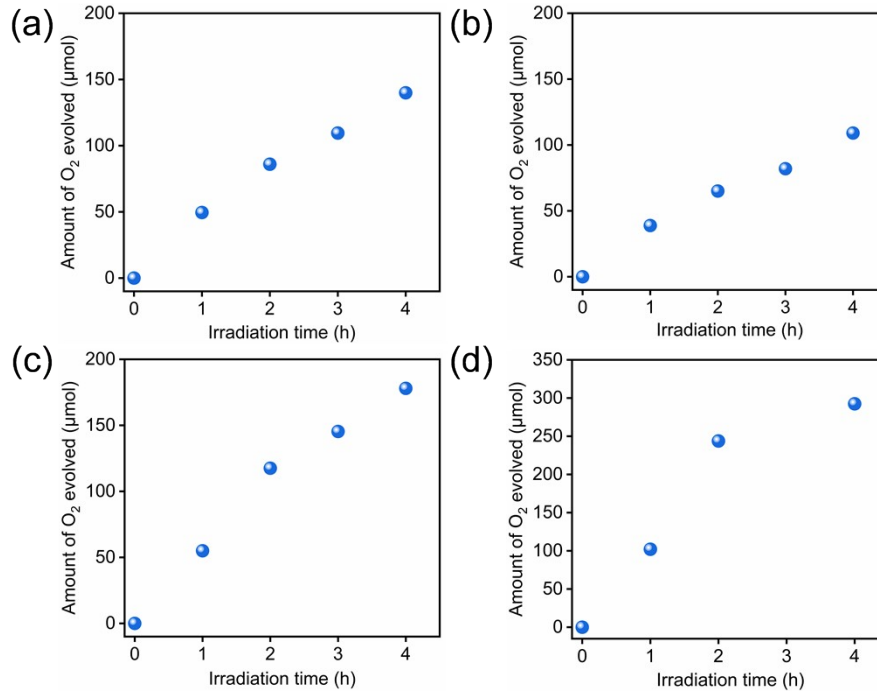

**Fig. S2** Time course of photocatalytic O<sub>2</sub>-evolution activity on (a) Pt-modified Bi<sub>4</sub>TaO<sub>8</sub>Cl, (b) Pt-modified Bi<sub>4</sub>TaO<sub>8</sub>Br, (c) Pt-modified Bi<sub>4</sub>TaO<sub>8</sub>Cl<sub>0.5</sub>Br<sub>0.5</sub> and (d) Pt-modified Bi<sub>4</sub>TaO<sub>8</sub>Cl<sub>0.9</sub>Br<sub>0.1</sub> from an aqueous Fe(NO<sub>3</sub>)<sub>3</sub> solution. Conditions: photocatalyst, 100 mg; cocatalyst, 0.3 wt% Pt; 10 mM aqueous Fe(NO<sub>3</sub>)<sub>3</sub> solution, 150mL; light source, 300 W Xenon lamp ( $\lambda \geq 420$  nm).

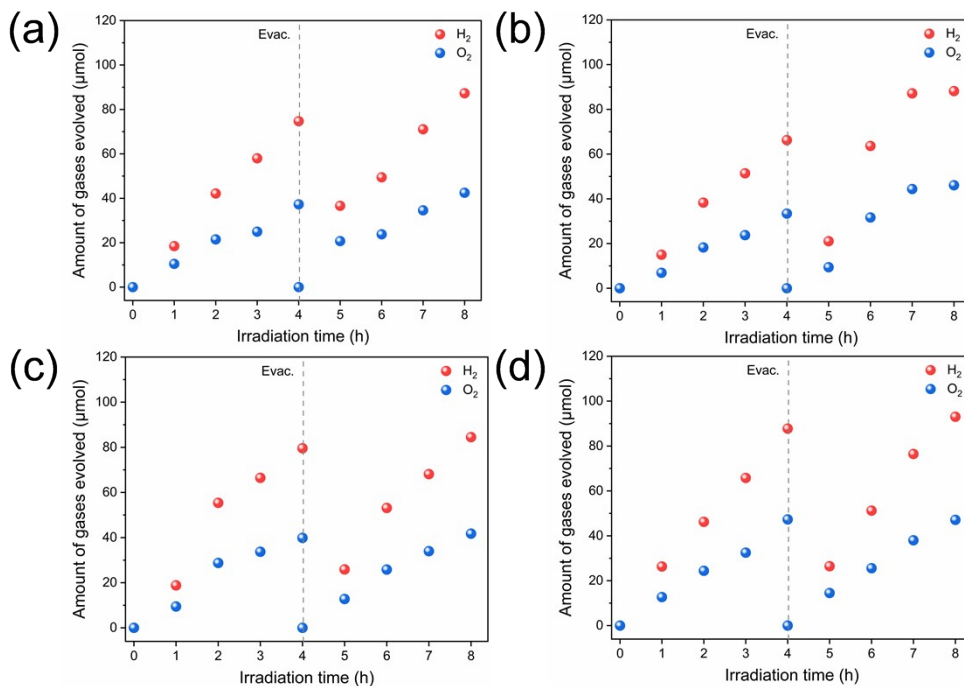

**Fig. S3** Time course of photocatalytic activity for two-step excitation overall water splitting reaction using (a) RGO and CoO<sub>x</sub> modified Bi<sub>4</sub>TaO<sub>8</sub>Cl, (b) RGO and CoO<sub>x</sub> modified Bi<sub>4</sub>TaO<sub>8</sub>Br, (c) RGO and CoO<sub>x</sub> modified Bi<sub>4</sub>TaO<sub>8</sub>Cl<sub>0.5</sub>Br<sub>0.5</sub> and (d) RGO and CoO<sub>x</sub> modified Bi<sub>4</sub>TaO<sub>8</sub>Cl<sub>0.9</sub>Br<sub>0.1</sub> as OEP. Conditions: Ru/SrTiO<sub>3</sub>:Rh as HEP, 50 mg; OEP (CoO<sub>x</sub>, 0.5 wt% as Co; RGO, 0.5 wt%), 50 mg; 150 mL H<sub>2</sub>O, pH = 4; light source, 300 W Xenon lamp ( $\lambda \geq 420$  nm).

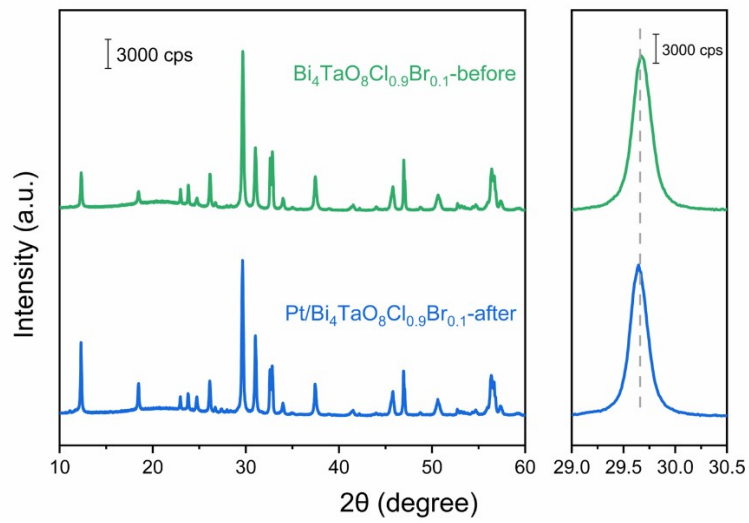

**Fig. S4** XRD patterns of  $\text{Bi}_4\text{TaO}_8\text{Cl}_{0.9}\text{Br}_{0.1}$  sample before photocatalytic reaction and Pt-modified  $\text{Bi}_4\text{TaO}_8\text{Cl}_{0.9}\text{Br}_{0.1}$  sample after photocatalytic reaction.

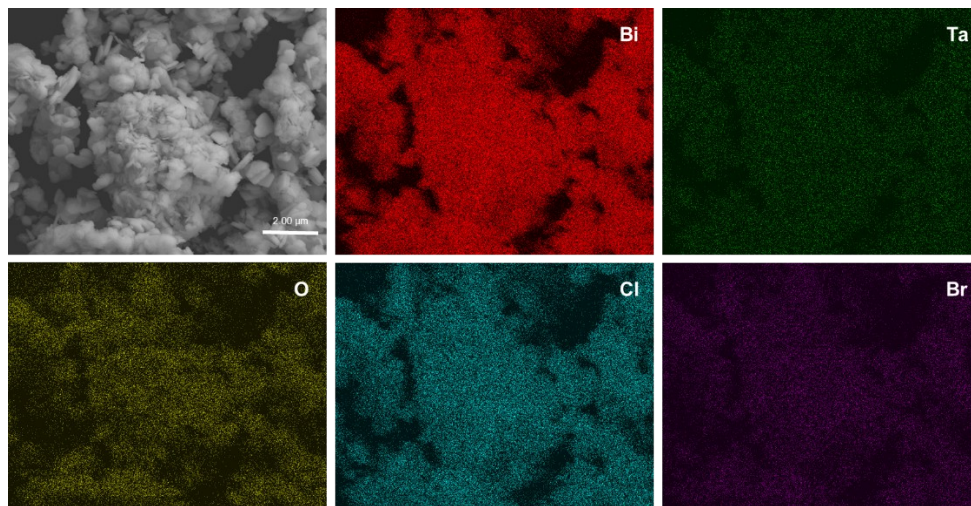

**Fig. S5** EDS elemental mapping of Pt-modified  $\text{Bi}_4\text{TaO}_8\text{Cl}_{0.9}\text{Br}_{0.1}$  sample after photocatalytic reaction.

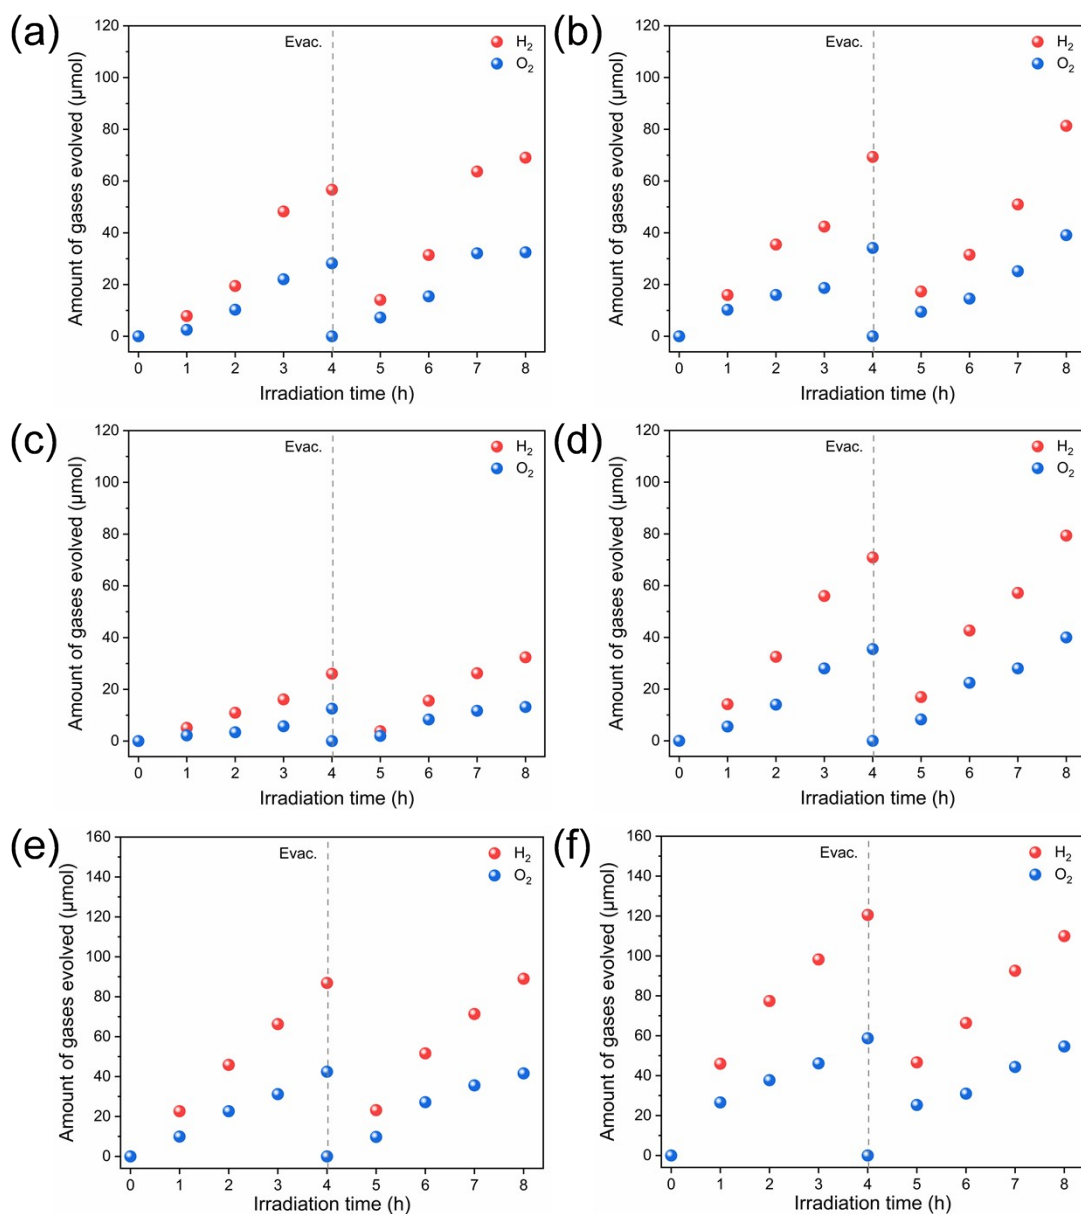

**Fig. S6** Time course of photocatalytic activity for two-step excitation overall water splitting reaction using  $\text{Bi}_4\text{TaO}_8\text{Cl}_{0.9}\text{Br}_{0.1}$  as OEP modified with (a)  $\text{IrO}_x$  calcined at 573 K, (b)  $\text{RuO}_x$  calcined at 573 K, (c)  $\text{PtO}_x$  calcined at 573 K, (d)  $\text{CoO}_x$  calcined at 573 K, (e)  $\text{RuO}_x$  calcined at 773 K, and (f)  $\text{CoO}_x$  calcined at 773 K. Conditions:  $\text{Ru}/\text{SrTiO}_3:\text{Rh}$  as HEP, 50 mg; surface-modified  $\text{Bi}_4\text{TaO}_8\text{Cl}_{0.9}\text{Br}_{0.1}$  ( $\text{IrO}_x$ ,  $\text{RuO}_x$ ,  $\text{PtO}_x$  or  $\text{CoO}_x$ , 0.5 wt% as Ir, Ru, Pt or Co; RGO, 0.5 wt%), 50 mg; 150 mL  $\text{H}_2\text{O}$ , pH = 4; light source, 300 W Xenon lamp ( $\lambda \geq 420$  nm).

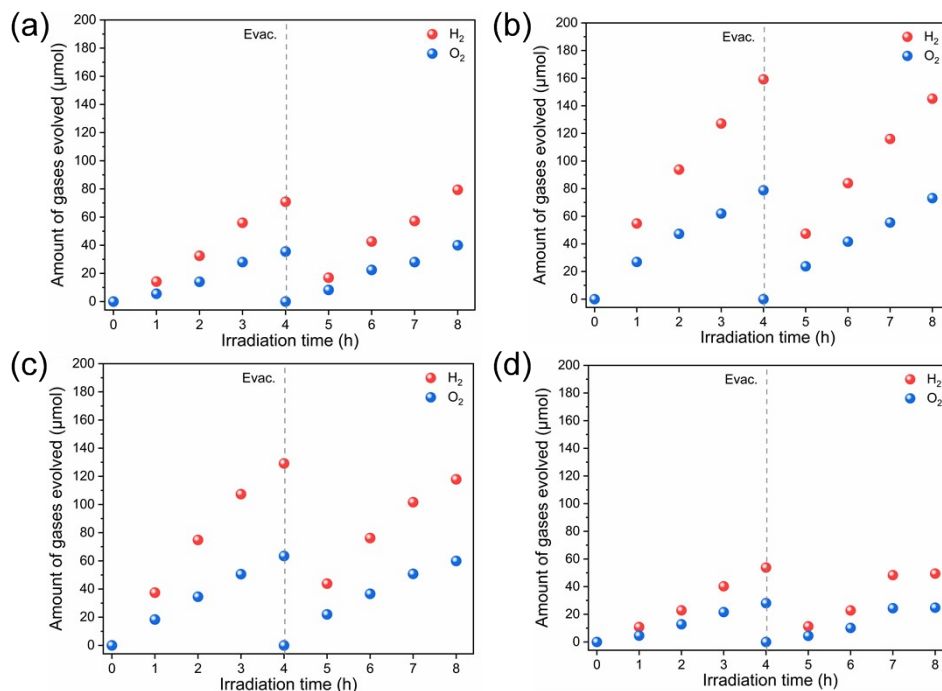

**Fig. S7** Time course of photocatalytic activity for two-step excitation overall water splitting reaction using  $\text{CoO}_x$ -modified  $\text{Bi}_4\text{TaO}_8\text{Cl}_{0.9}\text{Br}_{0.1}$  as OEP calcined at (a) 573 K, (b) 673 K, (c) 773 K, (d) 873 K. Conditions: Ru/SrTiO<sub>3</sub>:Rh as HEP, 50 mg; surface-modified  $\text{Bi}_4\text{TaO}_8\text{Cl}_{0.9}\text{Br}_{0.1}$  ( $\text{CoO}_x$ , 0.5 wt% as Co; RGO, 0.5 wt%), 50 mg; 150 mL H<sub>2</sub>O, pH = 4; light source, 300 W Xenon lamp ( $\lambda \geq 420$  nm).

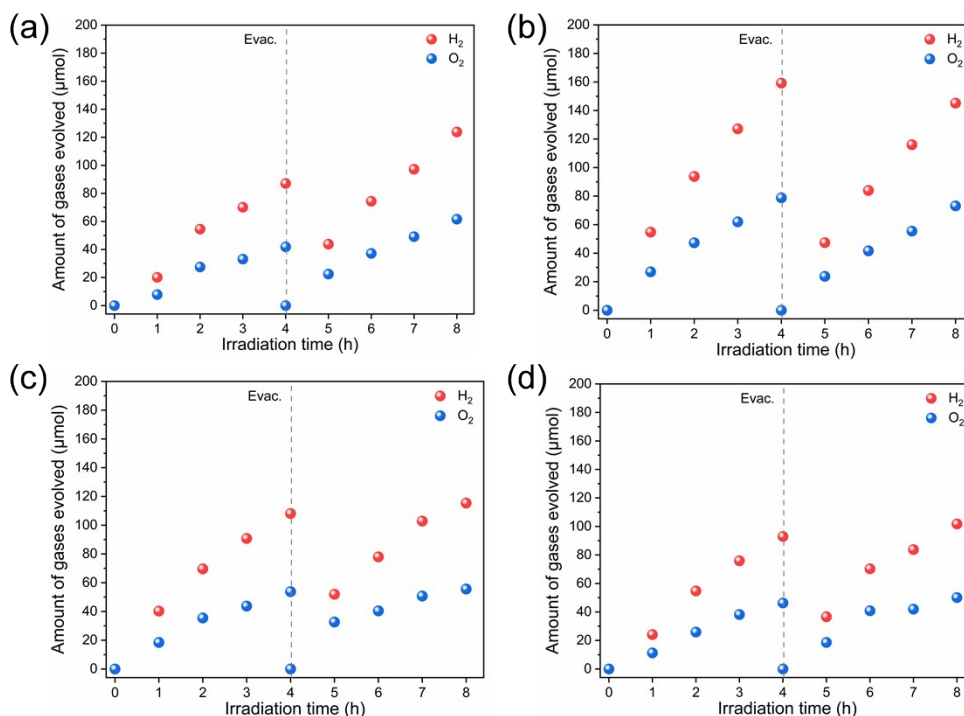

**Fig. S8** Time course of photocatalytic activity for two-step excitation overall water splitting reaction using  $\text{CoO}_x$ -modified  $\text{Bi}_4\text{TaO}_8\text{Cl}_{0.9}\text{Br}_{0.1}$  at 673 K as OEP with Co contents of (a) 0.3 wt%, (b) 0.5 wt%, (c) 0.8 wt%, (d) 1 wt%. Conditions: Ru/SrTiO<sub>3</sub>:Rh as HEP, 50 mg; surface-modified  $\text{Bi}_4\text{TaO}_8\text{Cl}_{0.9}\text{Br}_{0.1}$  (RGO, 0.5 wt%), 50 mg; 150 mL H<sub>2</sub>O, pH = 4; light source, 300 W Xenon lamp ( $\lambda \geq 420$  nm).

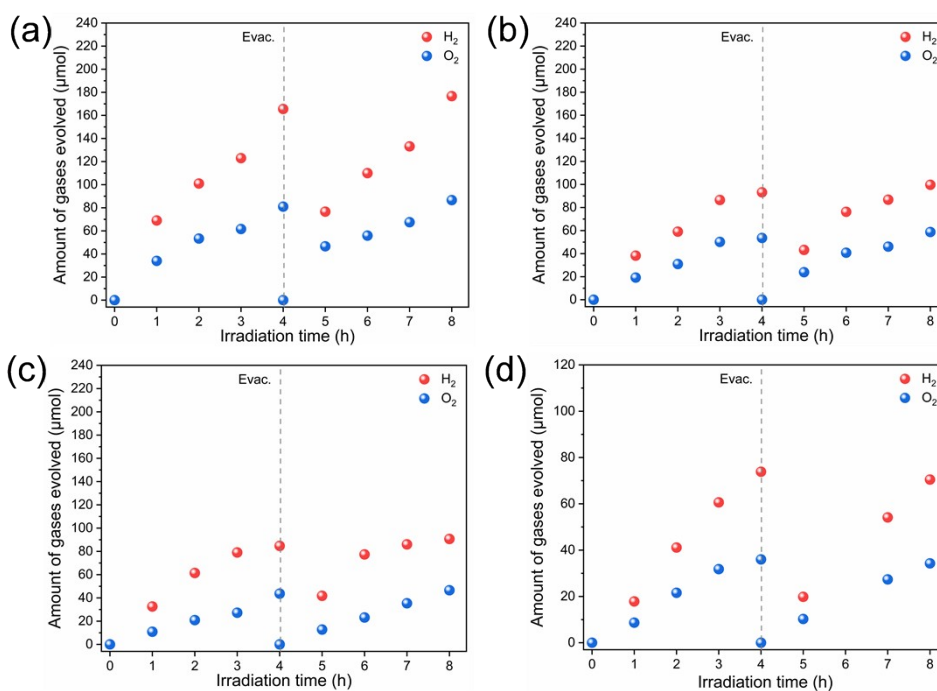

**Fig. S9** Time course of photocatalytic activity for two-step excitation overall water splitting reaction using  $\text{CoO}_x$ -modified  $\text{Bi}_4\text{TaO}_8\text{Cl}_{0.9}\text{Br}_{0.1}$  as OEP with different electron mediators (a) RGO, (b) Ir, (c) Au, (d)  $\text{Fe}^{3+}/\text{Fe}^{2+}$ . Conditions: Ru/SrTiO<sub>3</sub>:Rh as HEP, 50 mg; surface-modified  $\text{Bi}_4\text{TaO}_8\text{Cl}_{0.9}\text{Br}_{0.1}$  ( $\text{CoO}_x$ , 0.5 wt% as Co; RGO, Ir or Au as mediator, 0.3 wt%), 50 mg; 150 mL H<sub>2</sub>O (150 mL of 2mM  $\text{Fe}(\text{NO}_3)_3$  solution for (d)), pH = 4 (pH = 2.4 for (d)); light source, 300 W Xenon lamp ( $\lambda \geq 420$  nm).

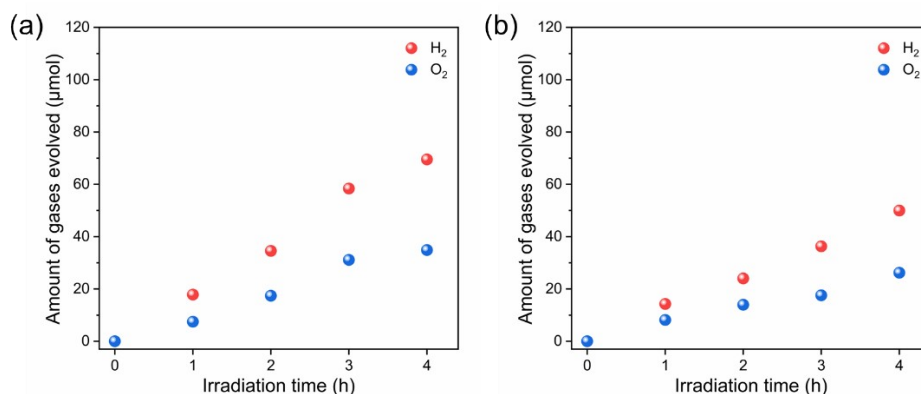

**Fig. S10** (a) Time course of gas evolution during two-step photoexcitation water splitting reaction under visible light ( $\lambda \geq 420$  nm). Conditions: Ru/SrTiO<sub>3</sub>:Rh as HEP, 50 mg;  $\text{CoO}_x$ -modified  $\text{Bi}_4\text{TaO}_8\text{Cl}_{0.9}\text{Br}_{0.1}$  as OEP ( $\text{CoO}_x$ , 0.5 wt% as Co), 50 mg; 150 mL H<sub>2</sub>O, pH = 4; light source, 300 W Xenon lamp ( $\lambda \geq 420$  nm). (b) Time course of gas evolution during two-step photoexcitation water splitting reaction under visible light ( $\lambda \geq 420$  nm). Conditions: Ru/SrTiO<sub>3</sub>:Rh as HEP, 50 mg;  $\text{CoO}_x$ -modified  $\text{Bi}_4\text{TaO}_8\text{Cl}_{0.9}\text{Br}_{0.1}$  as OEP ( $\text{CoO}_x$ , 0.5 wt% as Co), 50 mg; GO, 0.3 wt% of OEP; 150 mL H<sub>2</sub>O, pH = 4; light source, 300 W Xenon lamp ( $\lambda \geq 420$  nm).

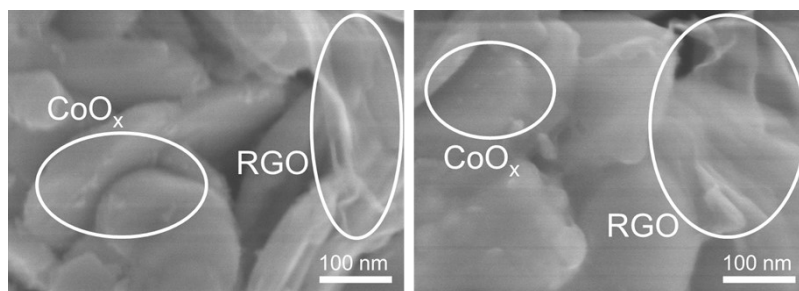

**Fig. S11** SEM images of RGO and  $\text{CoO}_x$  co-modified  $\text{Bi}_4\text{TaO}_8\text{Cl}_{0.9}\text{Br}_{0.1}$ .

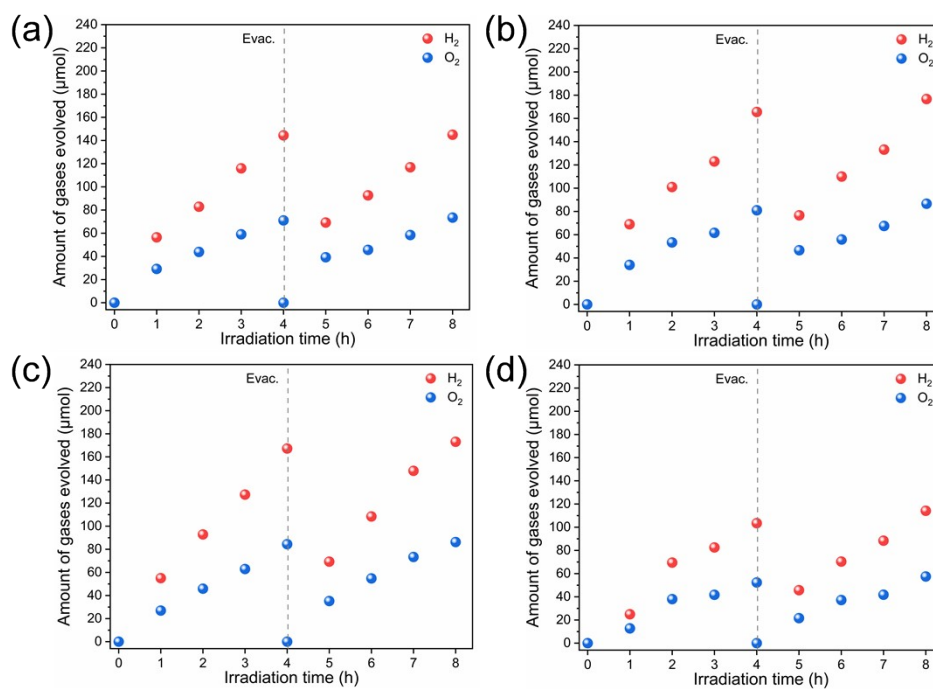

**Fig. S12** Time course of photocatalytic activity for two-step excitation overall water splitting reaction using  $\text{CoO}_x$ -modified  $\text{Bi}_4\text{TaO}_8\text{Cl}_{0.9}\text{Br}_{0.1}$  as OEP with RGO contents of (a) 0.1%, (b) 0.3%, (c) 0.5%, (d) 0.7%. Conditions:  $\text{Ru}/\text{SrTiO}_3:\text{Rh}$  as HEP, 50 mg; surface-modified  $\text{Bi}_4\text{TaO}_8\text{Cl}_{0.9}\text{Br}_{0.1}$  ( $\text{CoO}_x$ , 0.5 wt% as Co), 50 mg; 150 mL  $\text{H}_2\text{O}$ , pH = 4; light source, 300 W Xenon lamp ( $\lambda \geq 420$  nm).



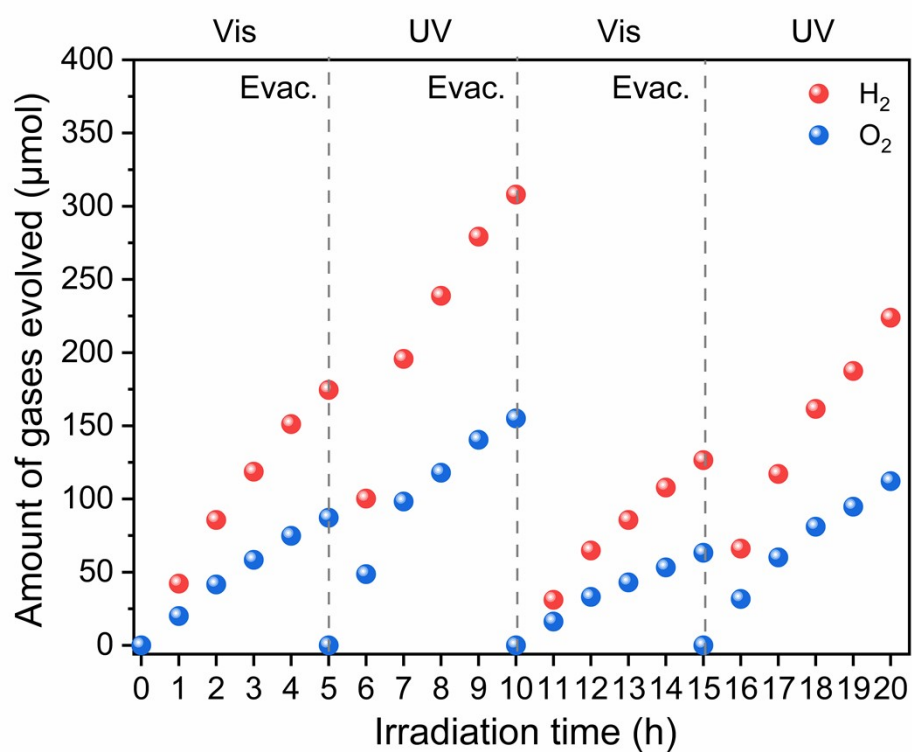

**Fig. S13** Time courses of gas evolution during two-step photoexcitation water splitting reaction under visible light ( $\lambda \geq 420$  nm) and ultraviolet light ( $\lambda \geq 300$  nm) irradiation. Conditions: Ru/SrTiO<sub>3</sub>:Rh, 50 mg; RGO and CoO<sub>x</sub> co-modified Bi<sub>4</sub>TaO<sub>8</sub>Cl<sub>0.9</sub>Br<sub>0.1</sub>, 50 mg; 150 mL H<sub>2</sub>O, pH=4; light source, 300 W Xenon lamp.
